# Supplementary material
Source: MDPI journal article supplement (https://www.mdpi.com/2039-4365/13/4/21)
Supplement: s1 [file s1]

## Supplement

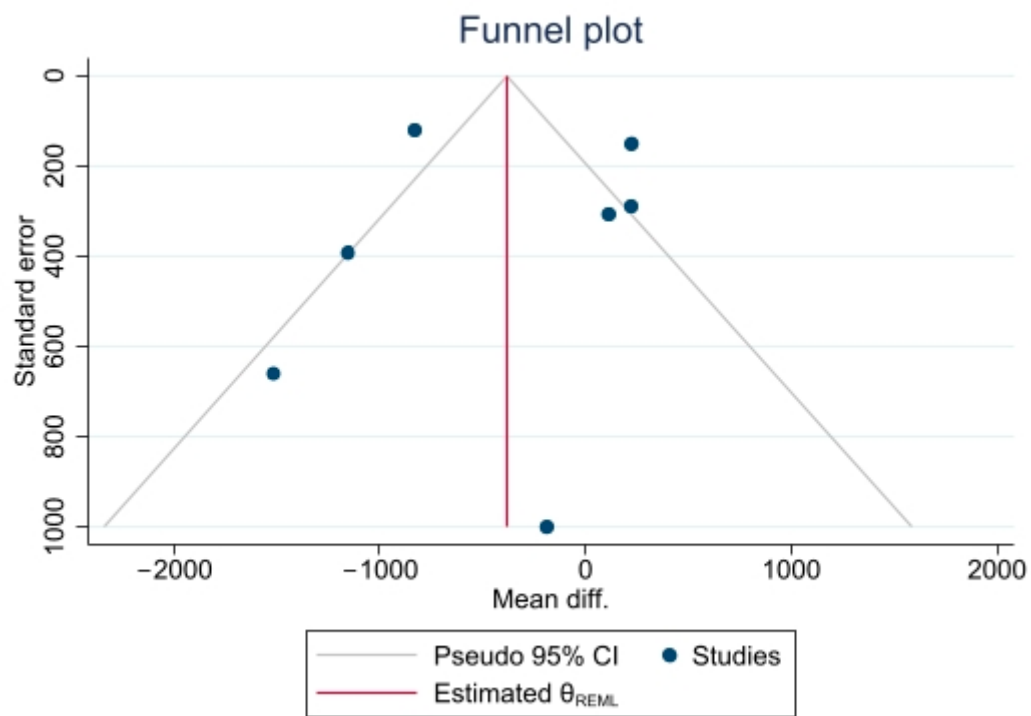

**Figure S1.** Funnel plot of mean difference for serum ferritin.

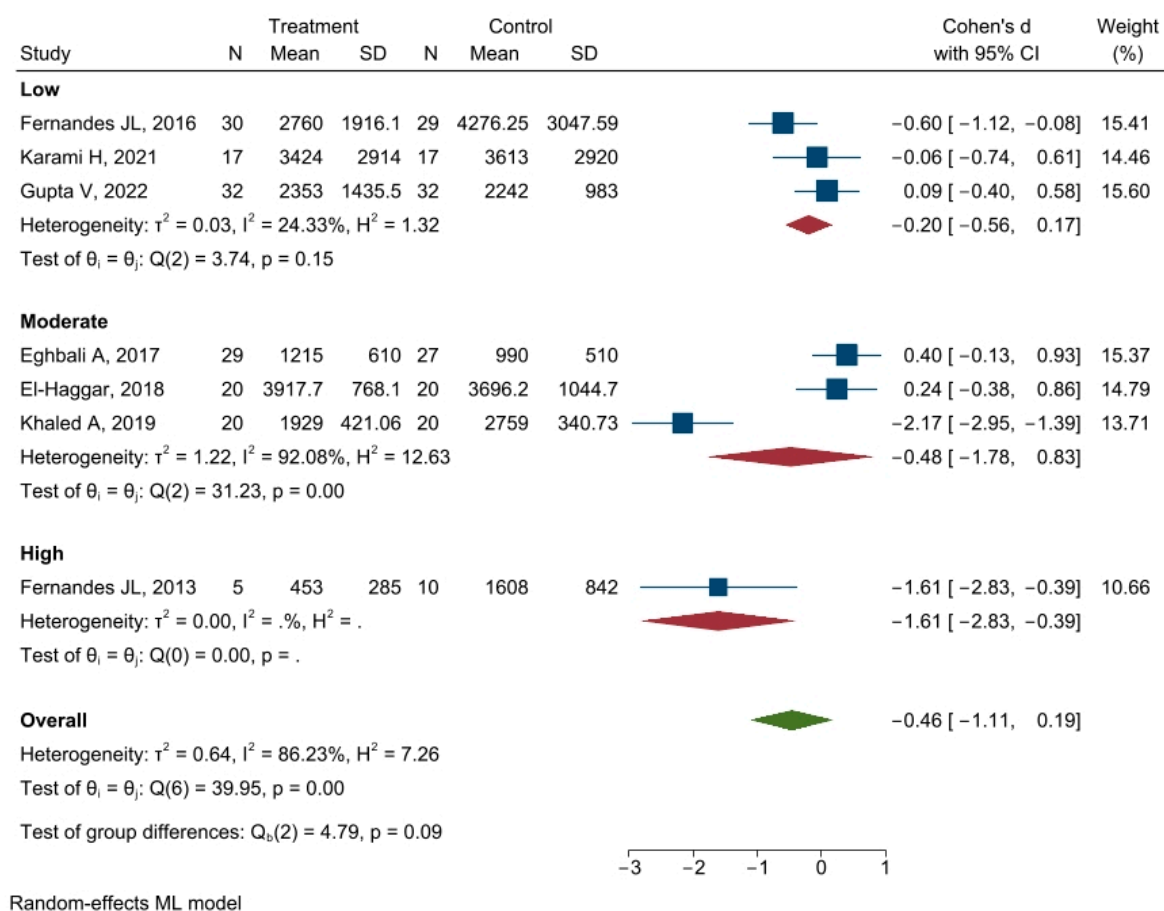

**Figure S2.** Forest plot of Cohens' d for serum ferritin based the risk of bias assessment.

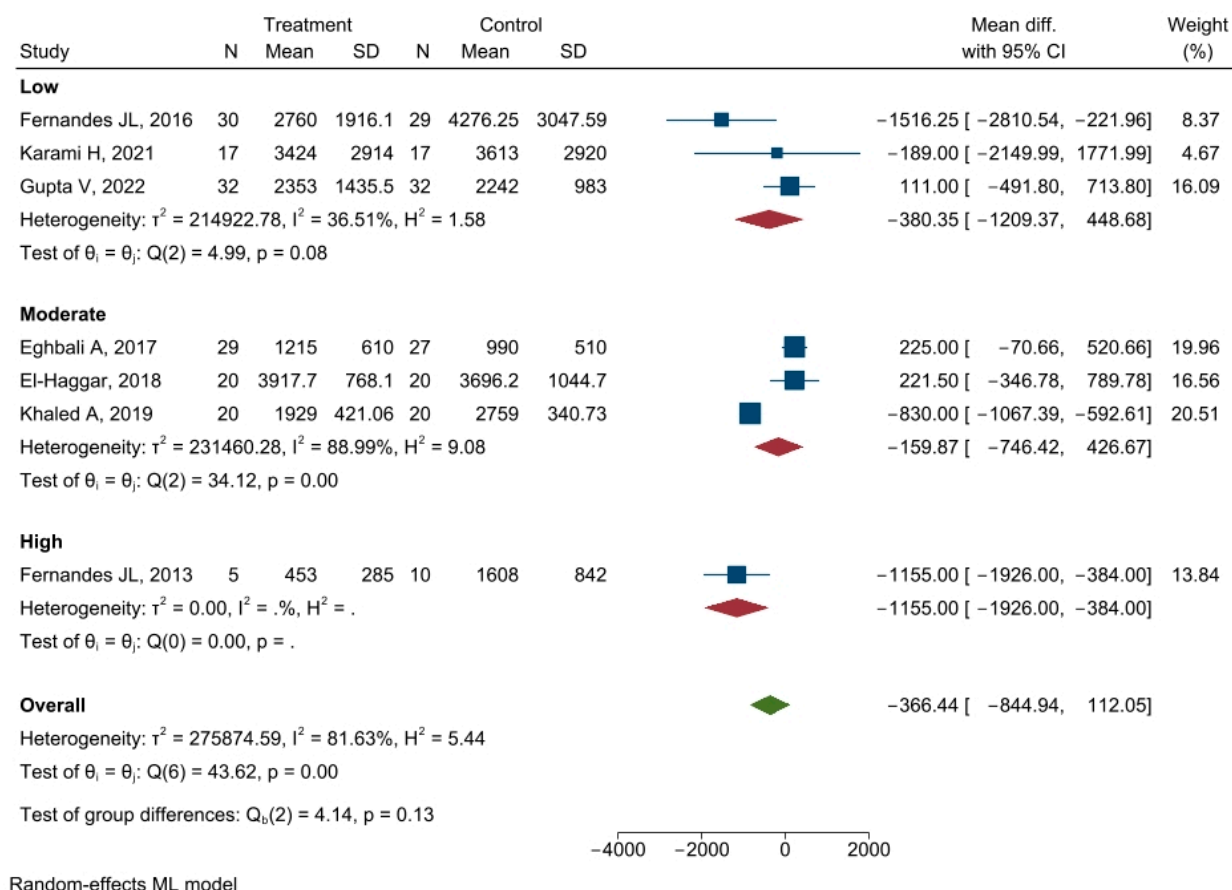

**Figure S3.** Forest plot of mean difference for serum ferritin based the risk of bias assessment.

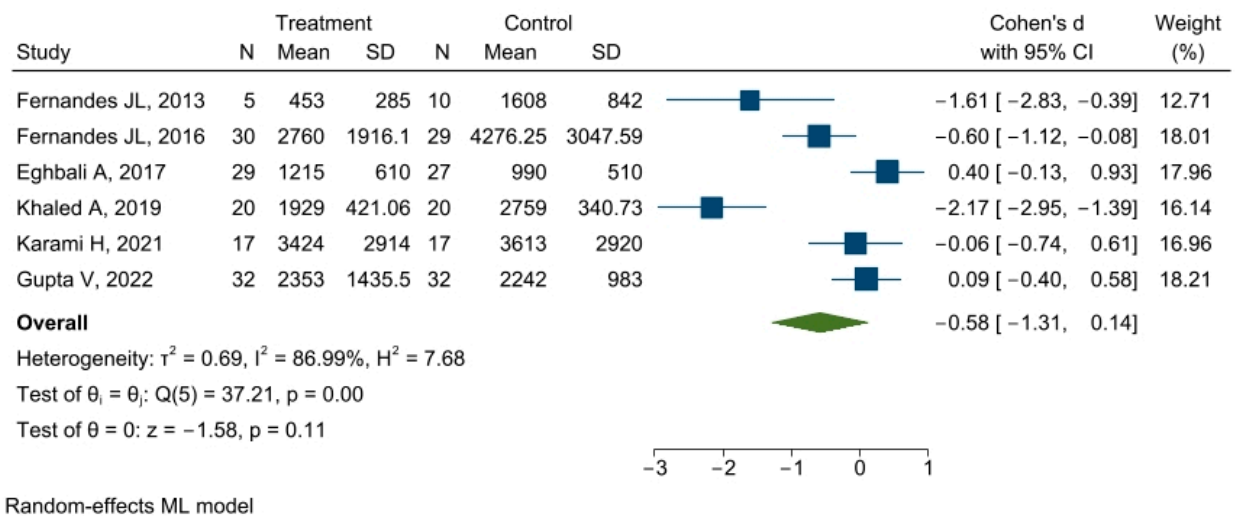

**Figure S4.** Forest plot of Cohen's d for serum ferritin after removing El-Haggar's study.

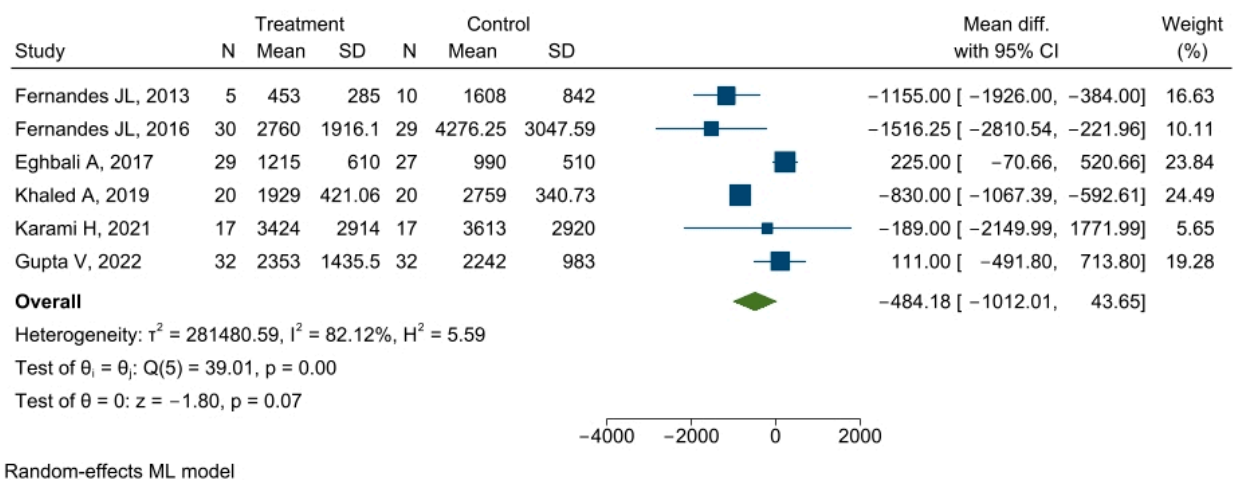

**Figure S5.** Forest plot of mean difference for serum ferritin after removing El-Haggar's study.

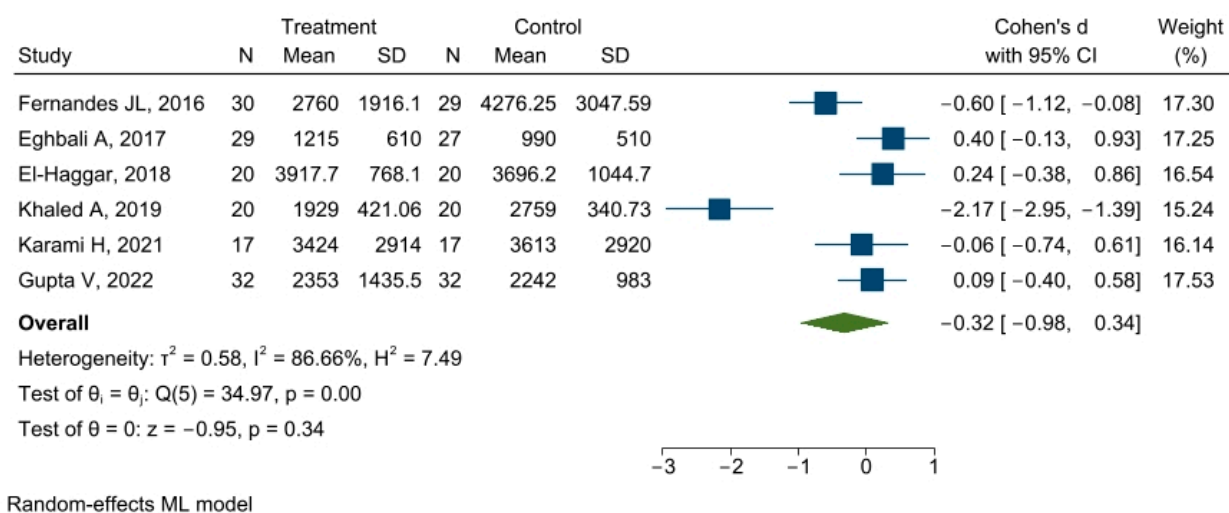

**Figure S6.** Forest plot of Cohen's d for serum ferritin after removing the study of Fernandes (2013).

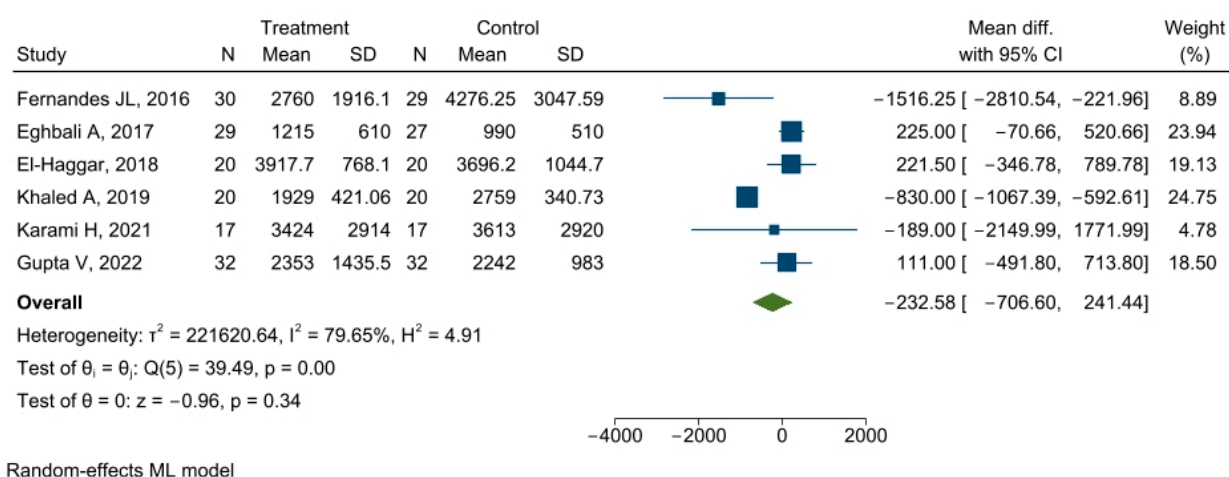

**Figure S7.** Forest plot of mean difference for serum ferritin after removing the study of Fernandes (2013).

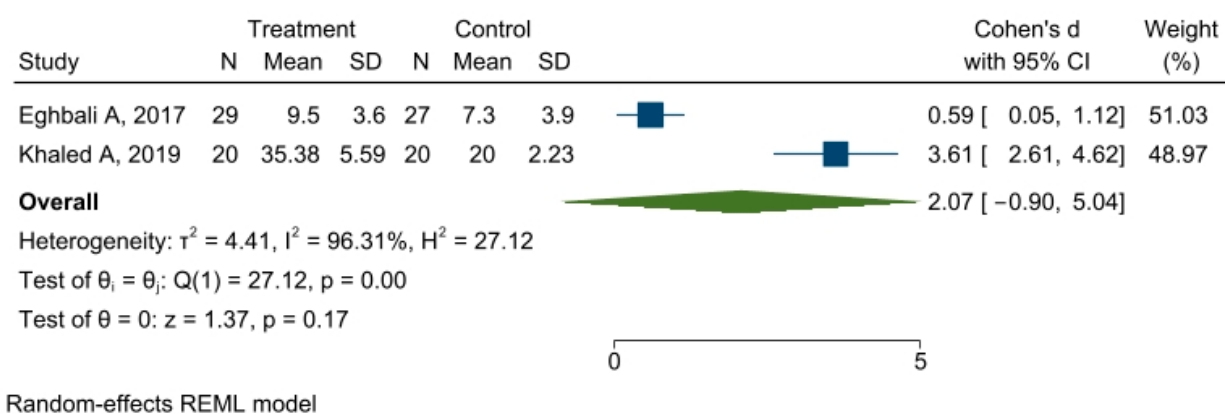

Figure S8. Forest plot of Cohens' d for liver MRI T2\*.

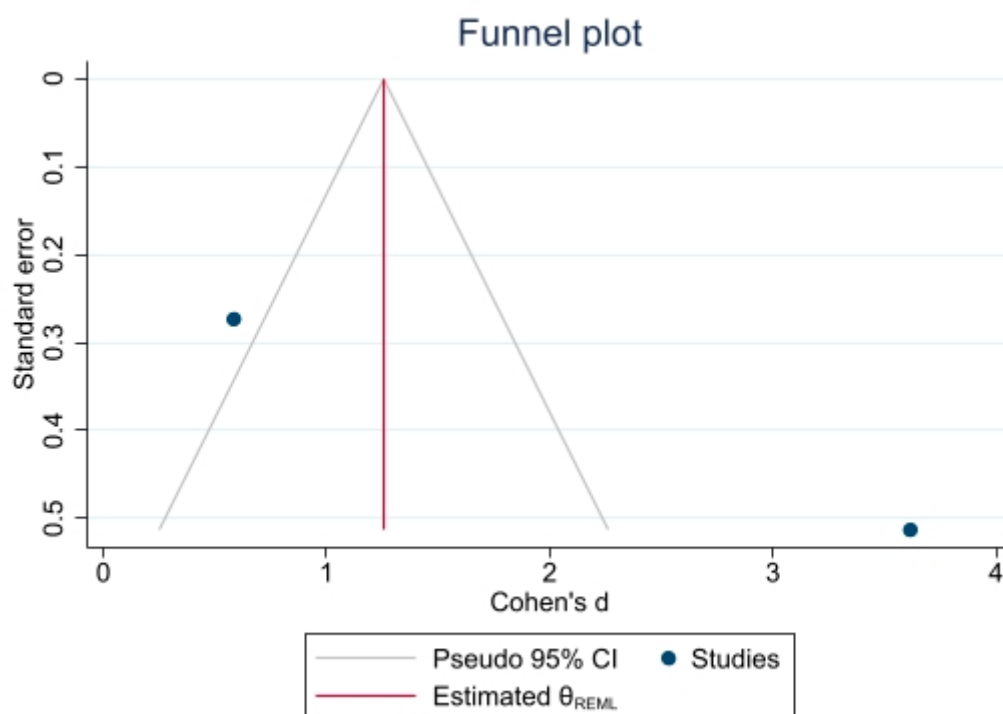

Figure S9. Funnel plot for liver MRI T2\*.

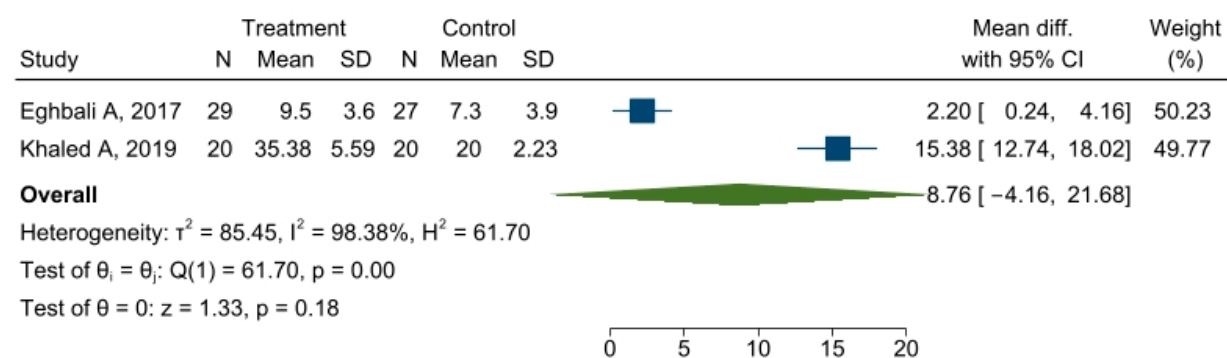

Random-effects REML model

**Figure S10.** Forest plot of mean difference for liver MRI T2\*.

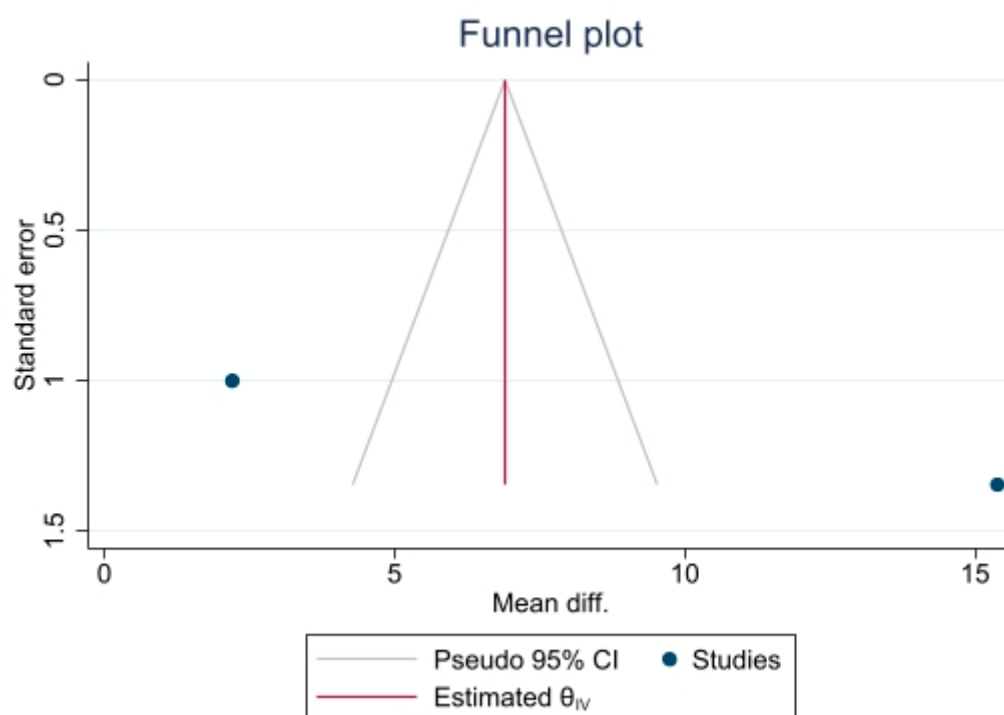

**Figure S11.** Funnel plot of mean difference for liver MRI T2\*.

**Table S1.** Assessment of risk of bias of included trials with support for judgment.

| <b>Bias</b>                            | <b>Judgment</b> | <b>Support for judgment</b>                                                                                                                                                           |
|----------------------------------------|-----------------|---------------------------------------------------------------------------------------------------------------------------------------------------------------------------------------|
| <b>Eghbali et al. (2017)</b>           |                 |                                                                                                                                                                                       |
| Random sequence generation             | Low risk        | Quote: "Randomized, parallel-group trial"<br>Comment: Probably done.                                                                                                                  |
| Allocation concealment                 | Low risk        | Quote: "63 patients were randomized 1:1"<br>Comment: Probably done.                                                                                                                   |
| Blinding of participants and personnel | Unclear         | Comment: Not described in sufficient detail.                                                                                                                                          |
| Blinding of outcome assessment         | Unclear         | Comment: Not described in sufficient detail.                                                                                                                                          |
| Incomplete outcome data                | Low risk        | Comment: No missing outcome data.                                                                                                                                                     |
| Selective reporting                    | Low risk        | Comment: All outcomes have been reported based on the protocol.                                                                                                                       |
| Other bias                             | Low risk        | Comment: Appropriate sample size calculation method; specified inclusion and exclusion criteria, the clinical trial registry number was IRCT2015080720715N2, no conflict of interest. |
| <b>El-Haggar et al. (2018)</b>         |                 |                                                                                                                                                                                       |
| Random sequence generation             | Low risk        | Quote: " comparative randomized clinical trial"<br>Comment: Probably done.                                                                                                            |
| Allocation concealment                 | Low risk        | Quote: "Forty patients were randomized into two groups"<br>Comment: Probably done.                                                                                                    |
| Blinding of participants and personnel | Unclear         | Comment: Not described in sufficient detail.                                                                                                                                          |
| Blinding of outcome assessment         | Unclear         | Comment: Not described in sufficient detail.                                                                                                                                          |
| Incomplete outcome data                | Low risk        | Comment: No missing outcome data.                                                                                                                                                     |
| Selective reporting                    | Low risk        | Comment: All outcomes have been reported based on the protocol.                                                                                                                       |
| Other bias                             | Low risk        | Comment: specified inclusion and exclusion criteria, the clinical trial registry number NCT02671695, no conflict of interest.                                                         |
| <b>Fernandes et al. (2016)</b>         |                 |                                                                                                                                                                                       |
| Random sequence generation             | Low risk        | Quote: "multicenter, randomized, placebo-controlled"<br>Comment: Probably done.                                                                                                       |
| Allocation concealment                 | Low risk        | Quote: "Allocation of patients and pill distribution were done by the central pharmacy"<br>Comment: Probably done.                                                                    |
| Blinding of participants and personnel | Low risk        | Quote: "double-blind trial", "Allocation of patients and pill distribution were done by the central pharmacy"<br>Comment: Probably done.                                              |
| Blinding of outcome assessment         | Low risk        | Quote: "double-blind trial"<br>Comment: Probably done.                                                                                                                                |
| Incomplete outcome data                | Low risk        | Comment: No missing outcome data.                                                                                                                                                     |
| Selective reporting                    | Low risk        | Comment: All outcomes have been reported.                                                                                                                                             |
| Other bias                             | Low risk        | Comment: Appropriate sample size calculation method; specified inclusion and exclusion criteria, no conflict of interest.                                                             |
| <b>Fernandes et al. (2013)</b>         |                 |                                                                                                                                                                                       |



|                                        |           |                                                                                                                                                                              |
|----------------------------------------|-----------|------------------------------------------------------------------------------------------------------------------------------------------------------------------------------|
| Random sequence generation             | Unclear   | Comment: Not described in sufficient detail.                                                                                                                                 |
| Allocation concealment                 | Low risk  | "patients were randomized to receive amlodipine"                                                                                                                             |
| Blinding of participants and personnel | High risk | "Designed as an open-label, controlled trial."                                                                                                                               |
| Blinding of outcome assessment         | Low risk  | "The readers of the MR images were blinded to treatment allocation."                                                                                                         |
| Incomplete outcome data                | Low risk  | Comment: No missing outcome data.                                                                                                                                            |
| Selective reporting                    | Low risk  | Comment: All outcomes have been reported based on the protocol.                                                                                                              |
| Other bias                             | Low risk  | Comment: specified inclusion and exclusion criteria, the clinical trial registry number NCT01125254, no conflict of interest.                                                |
| <hr/> Karami et al. (2021)             |           |                                                                                                                                                                              |
| Random sequence generation             | Low risk  | Quote: "randomized, double-blind, crossover trial"<br>Comment: Probably done.                                                                                                |
| Allocation concealment                 | Low risk  | Quote: "online web randomizer was applied to produce a sequence of block randomization codes"<br>Comment: Probably done.                                                     |
| Blinding of participants and personnel | Low risk  | Quote: "double-blind trial"<br>Comment: Probably done.                                                                                                                       |
| Blinding of outcome assessment         | Low risk  | Quote: "double-blind trial"<br>Comment: Probably done.                                                                                                                       |
| Incomplete outcome data                | Low risk  | Comment: No missing outcome data.                                                                                                                                            |
| Selective reporting                    | Low risk  | Comment: All outcomes have been reported based on the protocol.                                                                                                              |
| Other bias                             | Low risk  | Comment: specified inclusion and exclusion criteria, the clinical trial registry number IRCT20090613002027N15, no conflict of interest.                                      |
| <hr/> Khaled et al. (2019)             |           |                                                                                                                                                                              |
| Random sequence generation             | Low risk  | Quote: "Single-center, prospective randomized, placebo-controlled trial with the allocation of a 1:1 ratio."<br>Comment: Probably done.                                      |
| Allocation concealment                 | Low risk  | Quote: "The clinical pharmacist generated a computer list to randomly allocate the patients"<br>Comment: Probably done.                                                      |
| Blinding of participants and personnel | Unclear   | Comment: Not described in sufficient detail.                                                                                                                                 |
| Blinding of outcome assessment         | Unclear   | Comment: Not described in sufficient detail.                                                                                                                                 |
| Incomplete outcome data                | Low risk  | Comment: No missing outcome data.                                                                                                                                            |
| Selective reporting                    | Low risk  | Comment: All outcomes have been reported based on the protocol.                                                                                                              |
| Other bias                             | Low risk  | Appropriate sample size calculation method; specified inclusion and exclusion criteria, the clinical trial registry number is PACTR201902478249291. no conflict of interest. |
